# Supplementary material for: Two-dimensional segmentation fusion tool: an extensible, free-to-use, user-friendly tool for combining different bidimensional segmentations
Source: Frontiers journal article supplement (doi:10.3389/fbioe.2024.1339723), 2024-01-31
Supplement: Data_Sheet_1.PDF [file Data_Sheet_1.PDF]

# Supplementary File 1

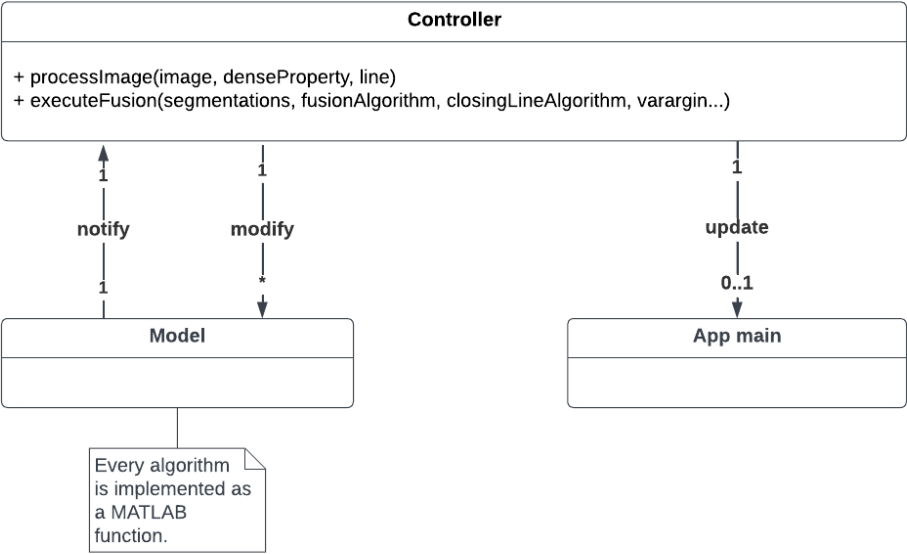

**Supplementary Figure 1.1:** TDSFT MVC architecture.
