# Supplementary material for: Two-dimensional segmentation fusion tool: an extensible, free-to-use, user-friendly tool for combining different bidimensional segmentations
Source: Frontiers journal article supplement (doi:10.3389/fbioe.2024.1339723), 2024-01-31
Supplement: Data_Sheet_2.PDF [file Data_Sheet_2.PDF]

## Supplementary File 2

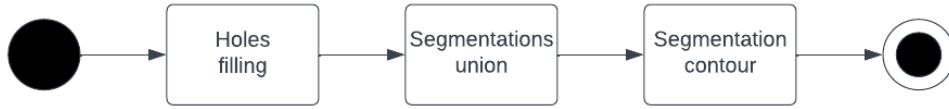

**Supplementary Figure 2.1:** Flowchart of “*Largest*” algorithm.

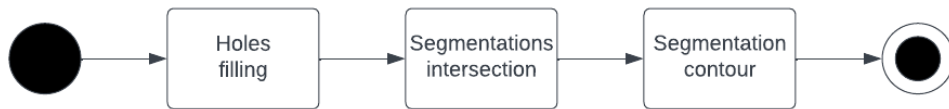

**Supplementary Figure 2.2:** Flowchart of “*Smallest*” algorithm.

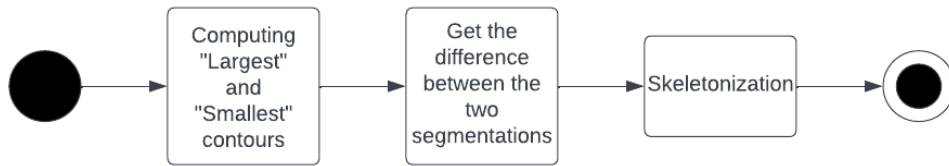

**Supplementary Figure 2.3:** Flowchart of “*Average Smallest And Largest*” algorithm.

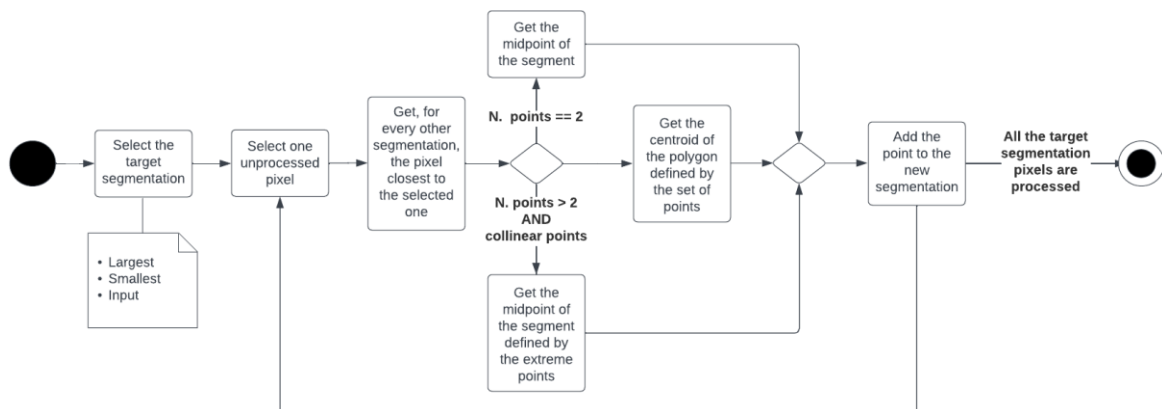

**Supplementary Figure 2.4:** Flowchart of “*Average With Target*” algorithms.

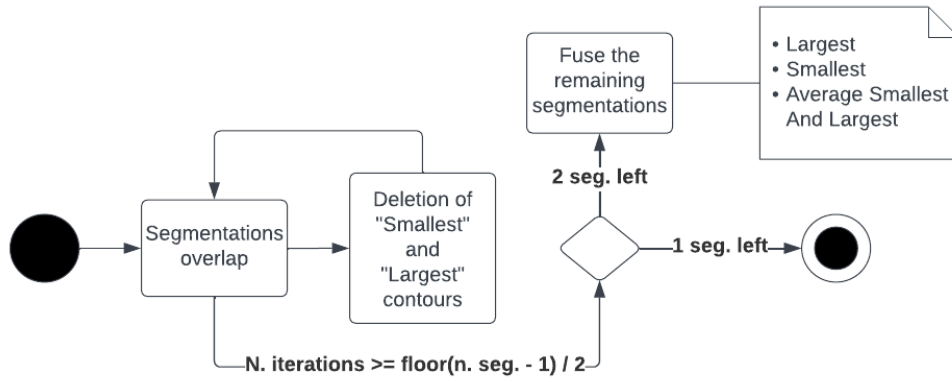

**Supplementary Figure 2.5:** Flowchart of “*Middle*” algorithm.

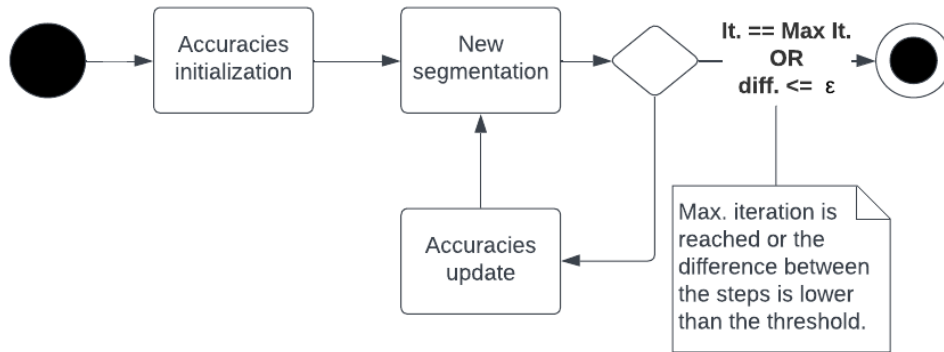

**Supplementary Figure 2.6:** Flowchart of “*STAPLE*” algorithm.
